# Supplementary material
Source: MDPI journal article supplement (https://www.mdpi.com/2076-3417/11/24/11854)
Supplement: s1 [file s1]

## S1. Supplementary results

### S1.1. Feature Importance Quantification on Train and Test Dataset (RMSE)

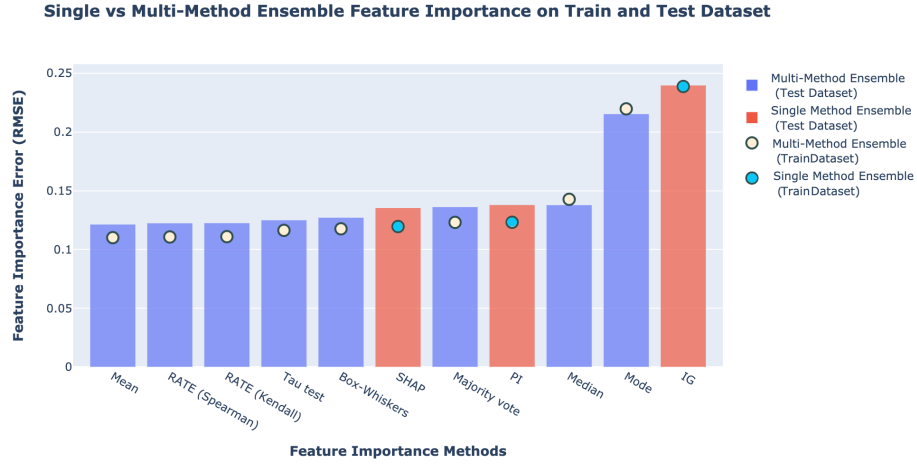

Figure S1: Average feature importance error between SME and MME with train and test dataset. (RMSE)

### S1.2. Feature Importance Quantification on Train and Test Dataset ( $R^2$ )

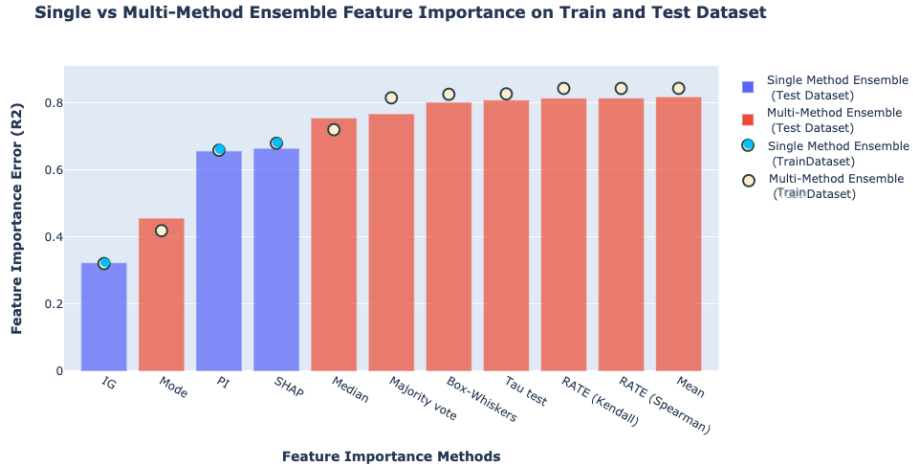

Figure S2: Average feature importance error between SME and MME with train and test dataset. ( $R^2$ )

### S1.3. Effect of Noise Level on All Feature Importance (RMSE)

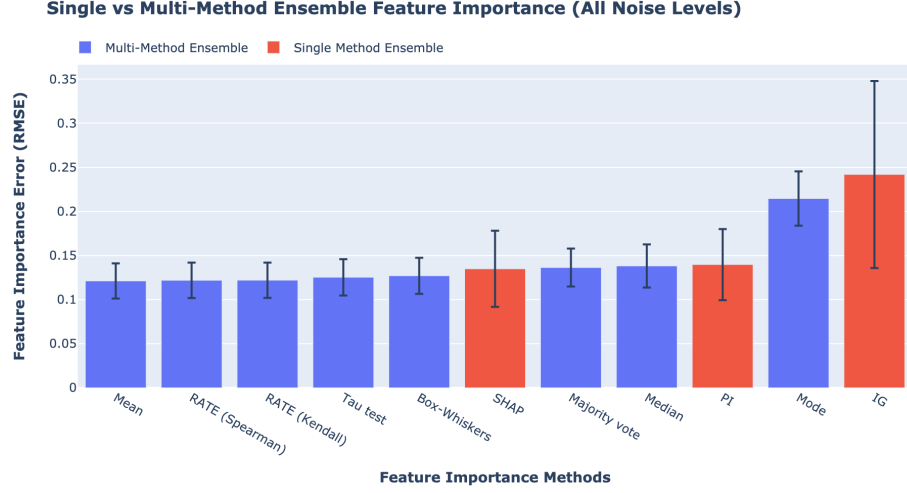

Figure S3: Effect of all noise level on all feature importance methods (RMSE)

|     |                 | Noise level (Standard deviation) |                 |                 |
|-----|-----------------|----------------------------------|-----------------|-----------------|
|     |                 | 0 ( $10^{-2}$ )                  | 2 ( $10^{-2}$ ) | 4 ( $10^{-2}$ ) |
| SME | PI              | 13.8±2.1                         | 13.4±2.0        | 14.5±2.7        |
|     | SHAP            | 13.4±2.4                         | 13.3±2.4        | 13.6±2.5        |
|     | IG              | 23.1±10.6                        | 25.0±10.5       | 24.3±10.6       |
| MME | RATE (Kendall)  | 12.0±3.2                         | 11.9±3.3        | 12.6±3.7        |
|     | RATE (Spearman) | 12.0±3.3                         | 11.9±3.3        | 12.5±3.7        |
|     | Median          | 13.8±4.1                         | 13.8±3.2        | 14.3±4.6        |
|     | Mean            | 12.0±3.2                         | 11.8±3.3        | 12.5±3.7        |
|     | Mode            | 22.8±5.4                         | 19.9±5.3        | 21.5±5.1        |
|     | Box-whiskers    | 12.5±3.4                         | 12.6±3.4        | 12.9±3.7        |
|     | Tau test        | 12.3±3.4                         | 12.2±3.3        | 13.0±3.8        |
|     | Majority vote   | 13.3±3.7                         | 13.7±3.4        | 13.7±3.9        |

Table S1: Summary of feature importance RMSE between different SME and MME for different noise level.

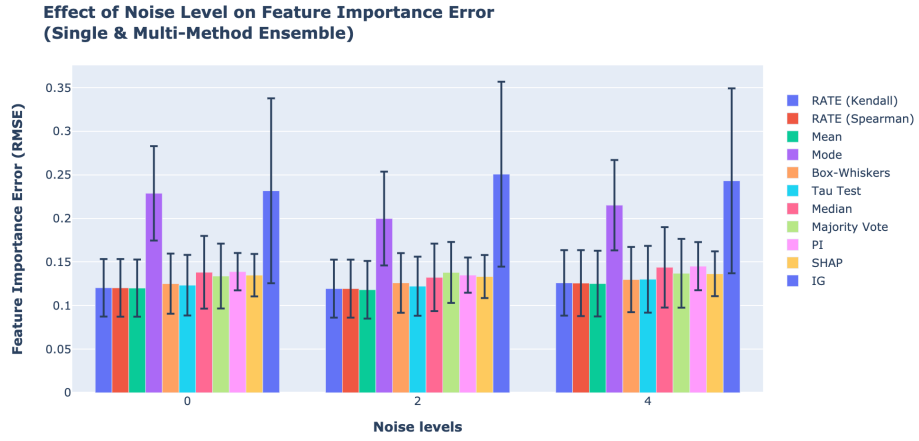

Figure S4: Effect of noise levels on ensemble feature importance. (RMSE)

#### S1.4. Effect of Noise Level on All Feature Importance ( $R^2$ )

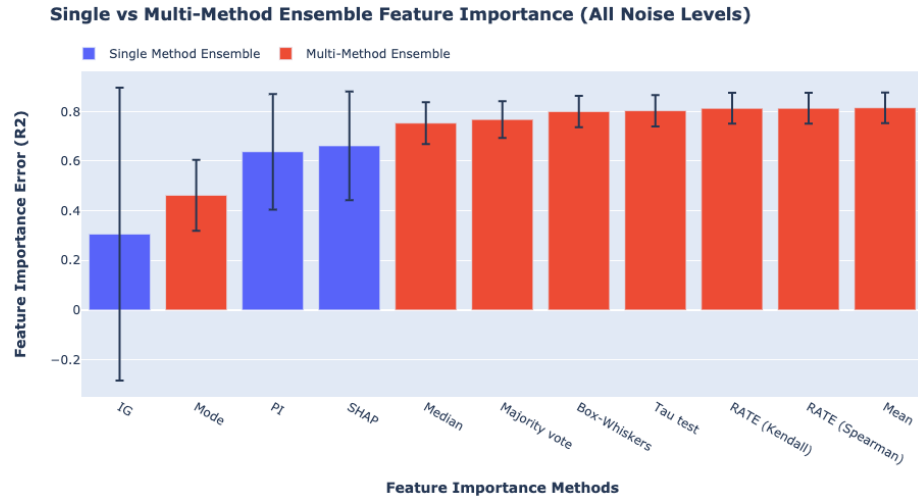

Figure S5: Effect of all noise level on all feature importance methods ( $R^2$ )

|     |                 | Noise level (Standard deviation) |           |           |
|-----|-----------------|----------------------------------|-----------|-----------|
|     |                 | 0                                | 2         | 4         |
| 0.  | PI              | 0.63±0.11                        | 0.67±0.10 | 0.60±0.17 |
|     | SHAP            | 0.65±0.12                        | 0.67±0.11 | 0.65±0.13 |
|     | IG              | 0.29±0.59                        | 0.28±0.59 | 0.34±0.59 |
| MME | RATE (Kendall)  | 0.81±0.09                        | 0.82±0.10 | 0.79±0.11 |
|     | RATE (Spearman) | 0.81±0.09                        | 0.82±0.10 | 0.79±0.11 |
|     | Median          | 0.75±0.15                        | 0.78±0.12 | 0.72±0.15 |
|     | Mean            | 0.81±0.09                        | 0.82±0.10 | 0.79±0.11 |
|     | Mode            | 0.39±0.26                        | 0.52±0.25 | 0.46±0.22 |
|     | Box-whiskers    | 0.80±0.10                        | 0.80±0.10 | 0.79±0.11 |
|     | Tau test        | 0.80±0.11                        | 0.81±0.10 | 0.78±0.11 |
|     | Majority vote   | 0.77±0.12                        | 0.76±0.12 | 0.76±0.13 |

Table S2: Summary of feature importance  $R^2$  between different SME and MME for different noise level.

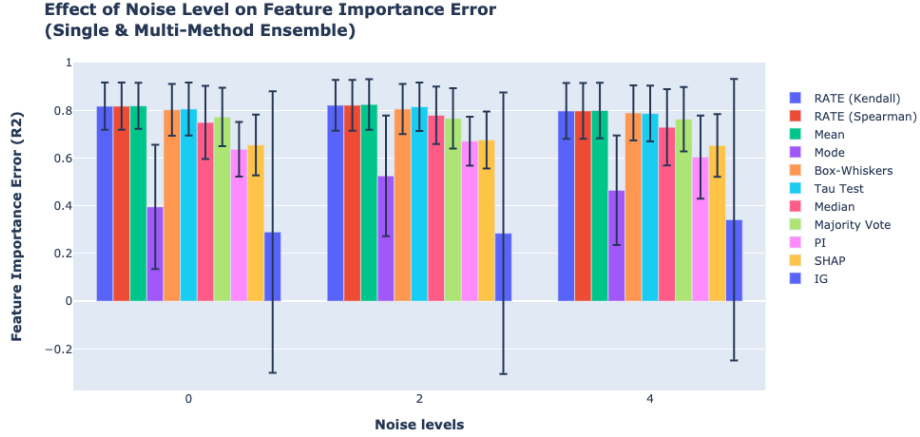

Figure S6: Effect of noise levels on ensemble feature importance. ( $R^2$ )

### S1.5. Effect Informative Level on All Feature Importance (RMSE)

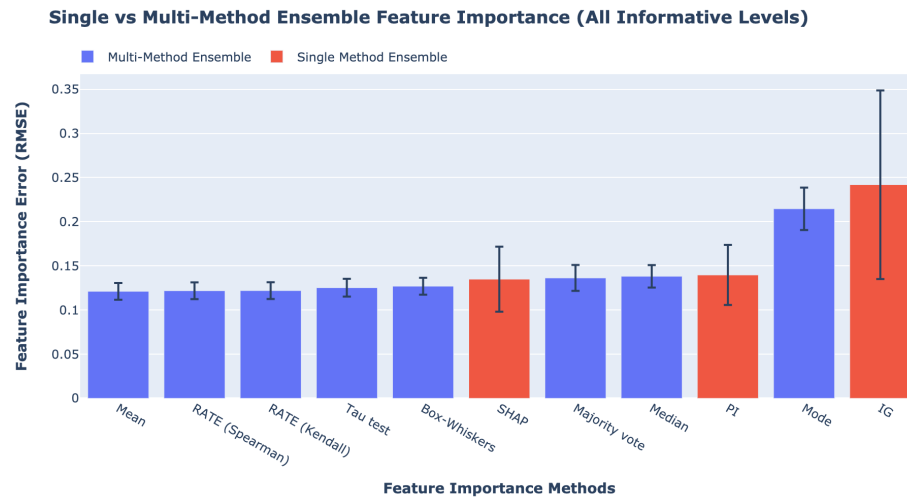

Figure S7: Effect of feature informative level on all ensemble feature importance methods. (RMSE)

|        |                 | Features informative level (%) |                  |                  |                  |                   |
|--------|-----------------|--------------------------------|------------------|------------------|------------------|-------------------|
| Models |                 | 20 ( $10^{-2}$ )               | 40 ( $10^{-2}$ ) | 60 ( $10^{-2}$ ) | 80 ( $10^{-2}$ ) | 100 ( $10^{-2}$ ) |
| SME    | PI              | 6.0±0.9                        | 11.1±1.2         | 15.6±2.3         | 17.4±1.2         | 19.5±1.4          |
|        | SHAP            | 5.1±0.8                        | 9.9±1.3          | 14.0±1.5         | 18.0±1.9         | 20.2±2.1          |
|        | IG              | 14.9±10.6                      | 19.7±10.6        | 24.0±10.6        | 26.7±10.6        | 32.1±10.6         |
| MME    | RATE (Kendall)  | 5.0±1.1                        | 9.2±1.7          | 13.2±2.1         | 15.3±1.9         | 18.1±3.1          |
|        | RATE (Spearman) | 5.0±1.1                        | 9.2±1.7          | 13.2±2.1         | 15.3±1.9         | 18.1±3.1          |
|        | Median          | 5.1±1.5                        | 10.8±2.5         | 15.3±2.7         | 17.5±3.1         | 20.1±3.7          |
|        | Mean            | 4.9±1.4                        | 9.2±1.7          | 13.1±2.0         | 15.2±1.9         | 17.9±3.1          |
|        | Mode            | 20.2±4.3                       | 18.8±6.0         | 22.9±6.1         | 22.6±4.8         | 22.5±5.3          |
|        | Box-whiskers    | 5.1±1.3                        | 9.8±1.8          | 13.7±2.0         | 16.2±2.0         | 18.5±3.1          |
|        | Tau test        | 5.0±1.4                        | 9.7±1.8          | 13.7±2.2         | 15.8±2.0         | 18.2±3.1          |
|        | Majority vote   | 8.0±2.4                        | 12.2±3.1         | 15.3±2.8         | 15.1±3.2         | 16.9±4.4          |

Table S3: Summary of feature importance RMSE between different SME and MME for different percentage of informative level.

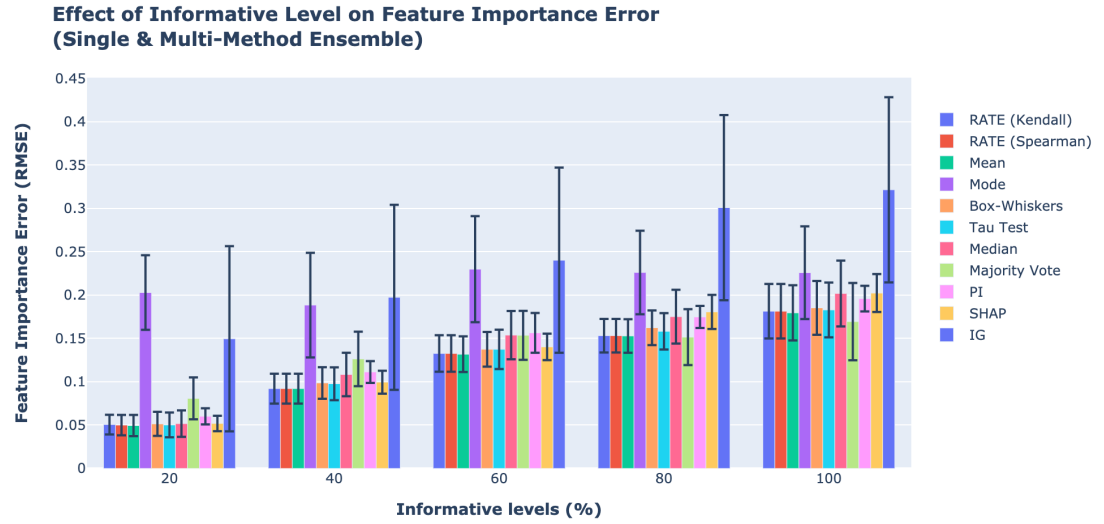

Figure S8: Effect of feature informative levels on ensemble feature importance methods. (RMSE)

### S1.6. Effect Informative Level on All Feature Importance ( $R^2$ )

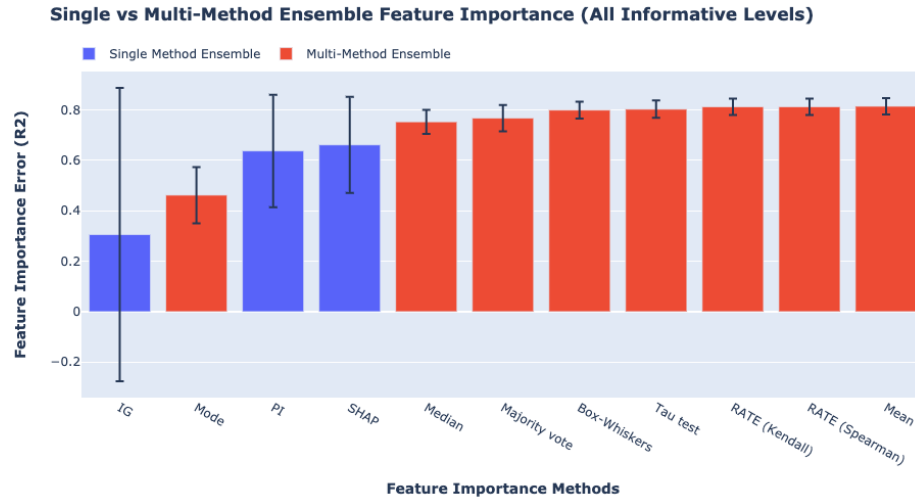

Figure S9: Effect of feature informative level on all ensemble feature importance methods. ( $R^2$ )

|        |                 | Features informative level (%) |           |           |           |            |
|--------|-----------------|--------------------------------|-----------|-----------|-----------|------------|
| Models |                 | 20                             | 40        | 60        | 80        | 100        |
| SME    | PI              | 0.90±0.02                      | 0.79±0.04 | 0.63±0.16 | 0.57±0.06 | 0.27±0.12  |
|        | SHAP            | 0.92±0.02                      | 0.83±0.04 | 0.73±0.05 | 0.55±0.08 | 0.25±0.15  |
|        | IG              | 0.65±0.58                      | 0.58±0.58 | 0.44±0.58 | 0.17±0.58 | -0.32±0.58 |
| MME    | RATE (Kendall)  | 0.95±0.01                      | 0.90±0.03 | 0.83±0.05 | 0.78±0.05 | 0.57±0.13  |
|        | RATE (Spearman) | 0.95±0.01                      | 0.90±0.03 | 0.83±0.05 | 0.78±0.05 | 0.57±0.13  |
|        | Median          | 0.95±0.02                      | 0.86±0.05 | 0.77±0.07 | 0.70±0.09 | 0.46±0.19  |
|        | Mean            | 0.95±0.01                      | 0.90±0.03 | 0.83±0.05 | 0.78±0.05 | 0.58±0.13  |
|        | Mode            | 0.37±0.22                      | 0.57±0.28 | 0.49±0.24 | 0.52±0.19 | 0.34±0.29  |
|        | Box-whiskers    | 0.95±0.02                      | 0.89±0.03 | 0.82±0.05 | 0.75±0.06 | 0.56±0.13  |
|        | Tau test        | 0.95±0.02                      | 0.89±0.03 | 0.82±0.05 | 0.76±0.06 | 0.57±0.14  |
|        | Majority vote   | 0.88±0.05                      | 0.81±0.07 | 0.77±0.08 | 0.77±0.09 | 0.59±0.20  |

Table S4: Summary of feature importance  $R^2$  between different SME and MME for different percentage of informative level.

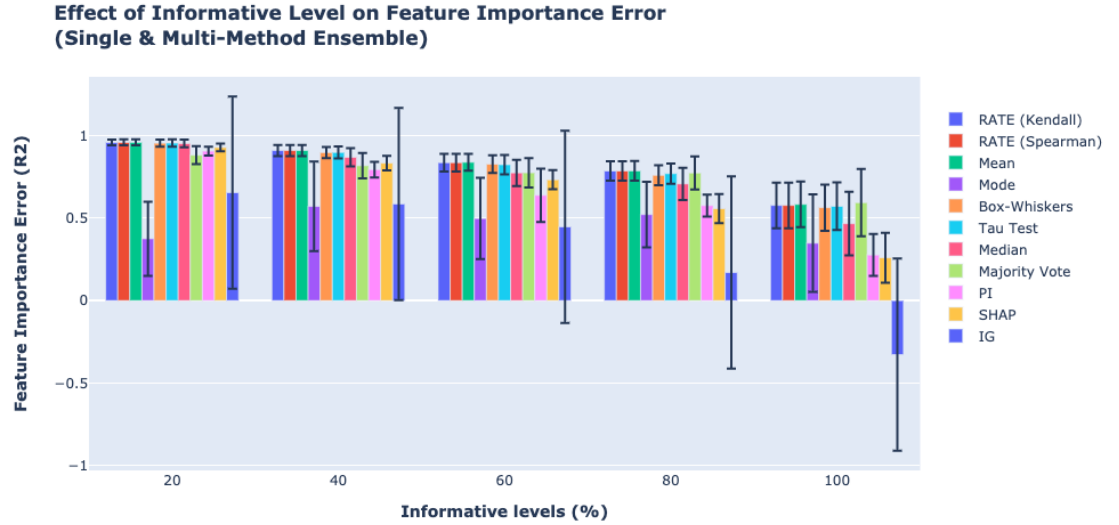

Figure S10: Effect of feature informative levels on ensemble feature importance methods. ( $R^2$ )



### S1.7. Effect of Number of Features on All Feature Importance (RMSE)

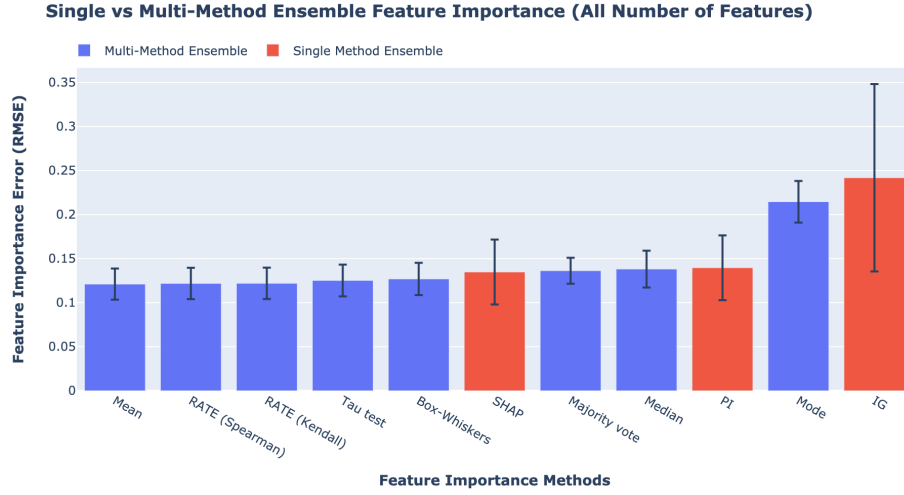

Figure S11: Effect of number of features on all ensemble feature importance methods. (RMSE)

|     |                 | Number of features |                  |                   |
|-----|-----------------|--------------------|------------------|-------------------|
|     |                 | 20 ( $10^{-2}$ )   | 60 ( $10^{-2}$ ) | 100 ( $10^{-2}$ ) |
| SME | PI              | 10.3±1.9           | 14.9±1.9         | 16.5±2.4          |
|     | SHAP            | 8.5±1.6            | 14.2±2.2         | 17.6±2.4          |
|     | IG              | 23.6±10.6          | 24.0±10.6        | 24.7±10.6         |
| MME | RATE (Kendall)  | 8.6±2.5            | 12.7±3.0         | 15.1±3.6          |
|     | RATE (Spearman) | 8.67±2.5           | 12.7±3.0         | 15.1±3.6          |
|     | Median          | 8.6±2.8            | 15.4±3.9         | 17.2±4.0          |
|     | Mean            | 8.5±2.5            | 12.7±2.9         | 15.0±3.6          |
|     | Mode            | 29.7±5.8           | 18.3±3.3         | 16.2±2.2          |
|     | Box-whiskers    | 9.0±2.8            | 13.5±3.1         | 15.4±3.5          |
|     | Tau test        | 8.5±2.7            | 13.4±3.0         | 15.5±3.5          |
|     | Majority vote   | 8.3±2.3            | 13.0±3.1         | 19.4±3.3          |

Table S5: Summary of feature importance RMSE between different SME and MME for different number of features.

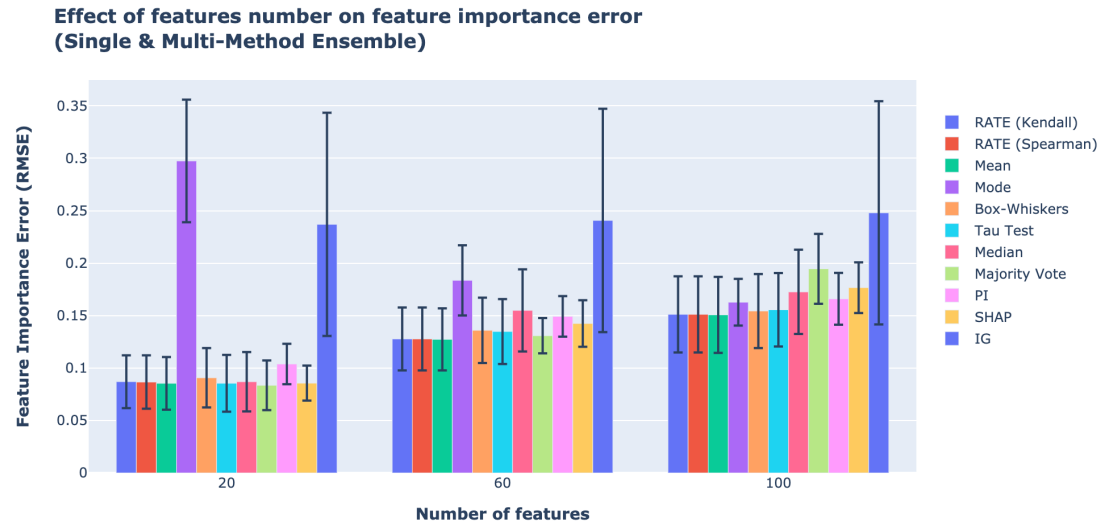

Figure S12: Effect of number of features on ensemble feature importance methods. (RMSE)

### S1.8. Effect of Number of Features on All Feature Importance ( $R^2$ )

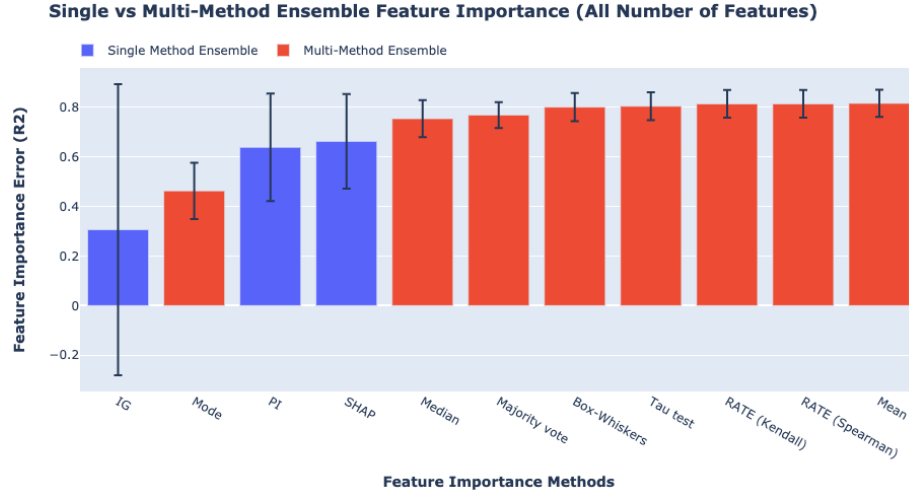

Figure S13: Effect of number of features on all ensemble feature importance methods. ( $R^2$ )

|     |                 | Number of features |           |           |
|-----|-----------------|--------------------|-----------|-----------|
|     |                 | 20                 | 60        | 100       |
| SME | PI              | 0.81±0.07          | 0.60±0.11 | 0.50±0.16 |
|     | SHAP            | 0.87±0.05          | 0.62±0.11 | 0.48±0.13 |
|     | IG              | 0.34±0.58          | 0.32±0.58 | 0.24±0.58 |
| MME | RATE (Kendall)  | 0.91±0.04          | 0.80±0.09 | 0.71±0.12 |
|     | RATE (Spearman) | 0.91±0.04          | 0.80±0.09 | 0.71±0.29 |
|     | Median          | 0.91±0.04          | 0.71±0.14 | 0.63±0.16 |
|     | Mean            | 0.91±0.04          | 0.80±0.09 | 0.71±0.12 |
|     | Mode            | 0.09±0.29          | 0.60±0.14 | 0.68±0.08 |
|     | Box-whiskers    | 0.90±0.04          | 0.78±0.09 | 0.70±0.13 |
|     | Tau test        | 0.91±0.04          | 0.78±0.09 | 0.70±0.13 |
|     | Majority vote   | 0.92±0.03          | 0.81±0.04 | 0.56±0.14 |
|     |                 |                    |           |           |

Table S6: Summary of feature importance  $R^2$  between different SME and MME for different number of features.

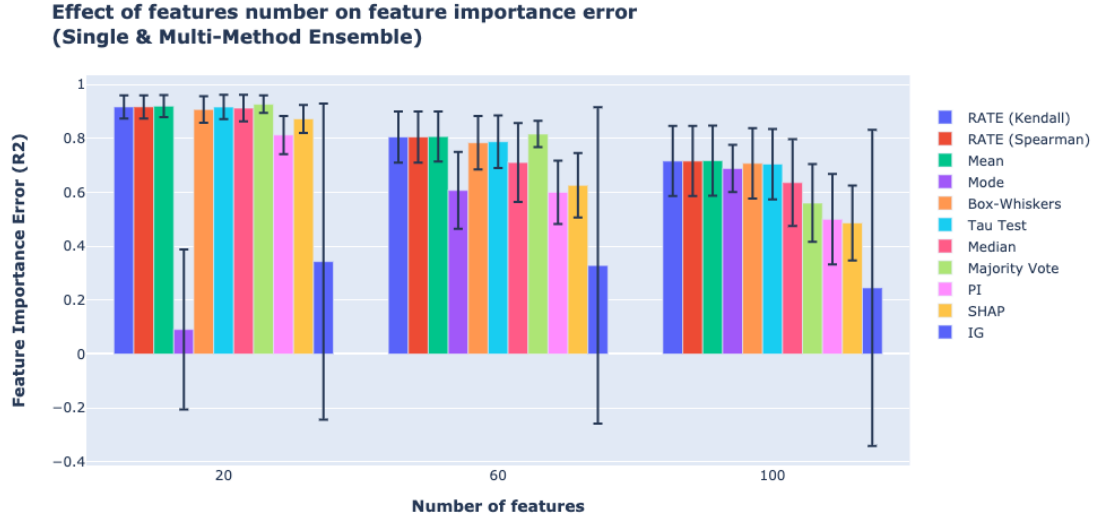

Figure S14: Effect of number of features on ensemble feature importance methods. ( $R^2$ )
